# Supplementary material
Source: publisher figshare collection journal article supplement (https://acs.figshare.com/ndownloader/files/3802276)

# Defect-tolerant Bioinspired Hierarchical Composites: Simulation and Experiment

Reza Mirzaeifar<sup>1,\*</sup>, Zhao Qin<sup>1</sup>, Markus J. Buehler<sup>1,†</sup>

<sup>1</sup> Laboratory for Atomistic and Molecular Mechanics, Department of Civil and Environmental Engineering, Massachusetts Institute of Technology, 77 Massachusetts Ave., Cambridge, MA, USA

<sup>†</sup> Corresponding author: E-mail: [mbuehler@MIT.EDU](mailto:mbuehler@MIT.EDU), phone: +1-617-452-2750, fax: +1-617-324-4014, lab URL: <http://web.mit.edu/mbuehler/www/>

## Supplementary information

The crack propagation paths in all tested bone-like and biocalcite-like samples with and without the pre-cracks are shown in Figure . As discussed in detail in Section 3 and clearly shown in the figures depicted below, the localized crack initiation and propagation in low hierarchy levels transforms to a distributed crack propagation mechanism at higher hierarchy levels, which consequently results in a significant improvement in the defect tolerance of these designs.

---

\* Present address: Mechanical Engineering Department, Virginia Polytechnic Institute and State University, Blacksburg, VA 24061, USA

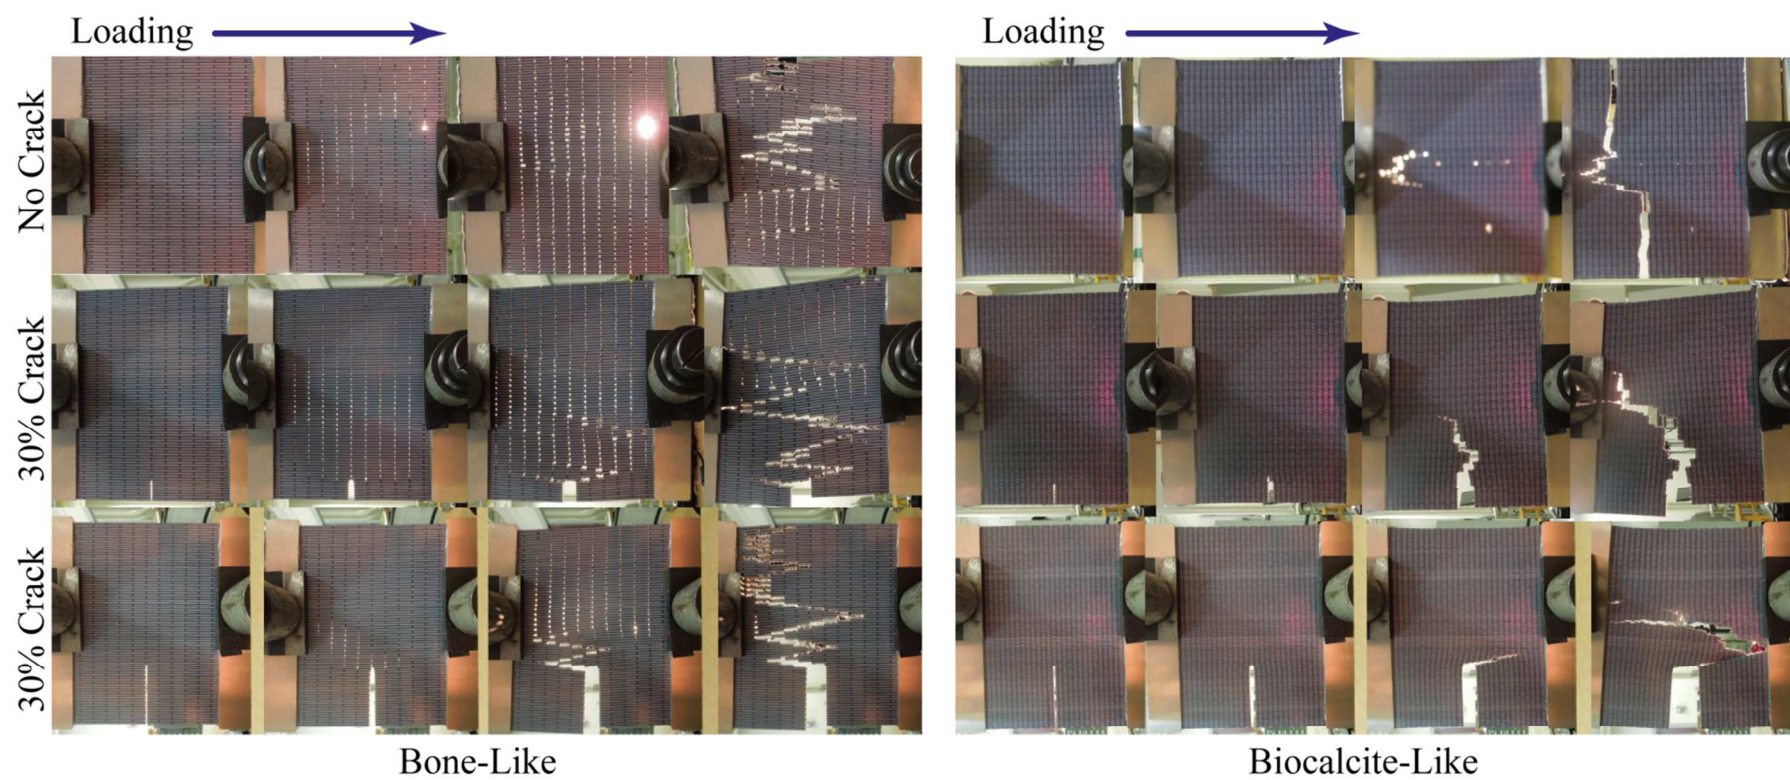

Figure S1: Snapshots of the crack propagation in two-hierarchy bone-like and biocalcite-like samples with different pre-crack sizes.

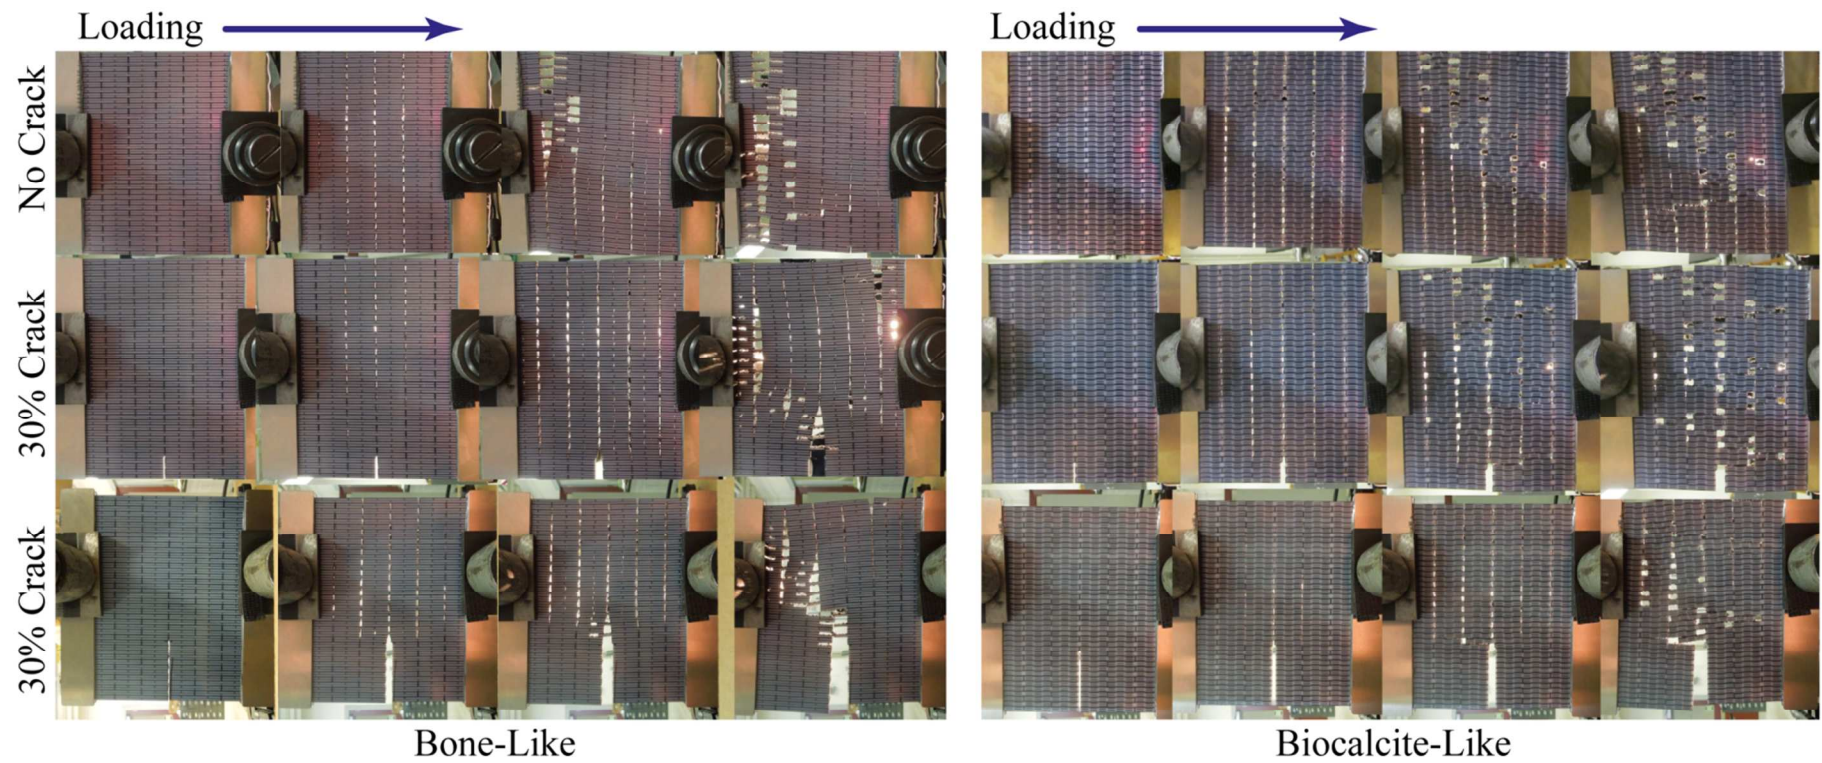

Figure S1 (contd.): Snapshots of the crack propagation in three-hierarchy bone-like and biocalcite-like samples with different pre-crack sizes.



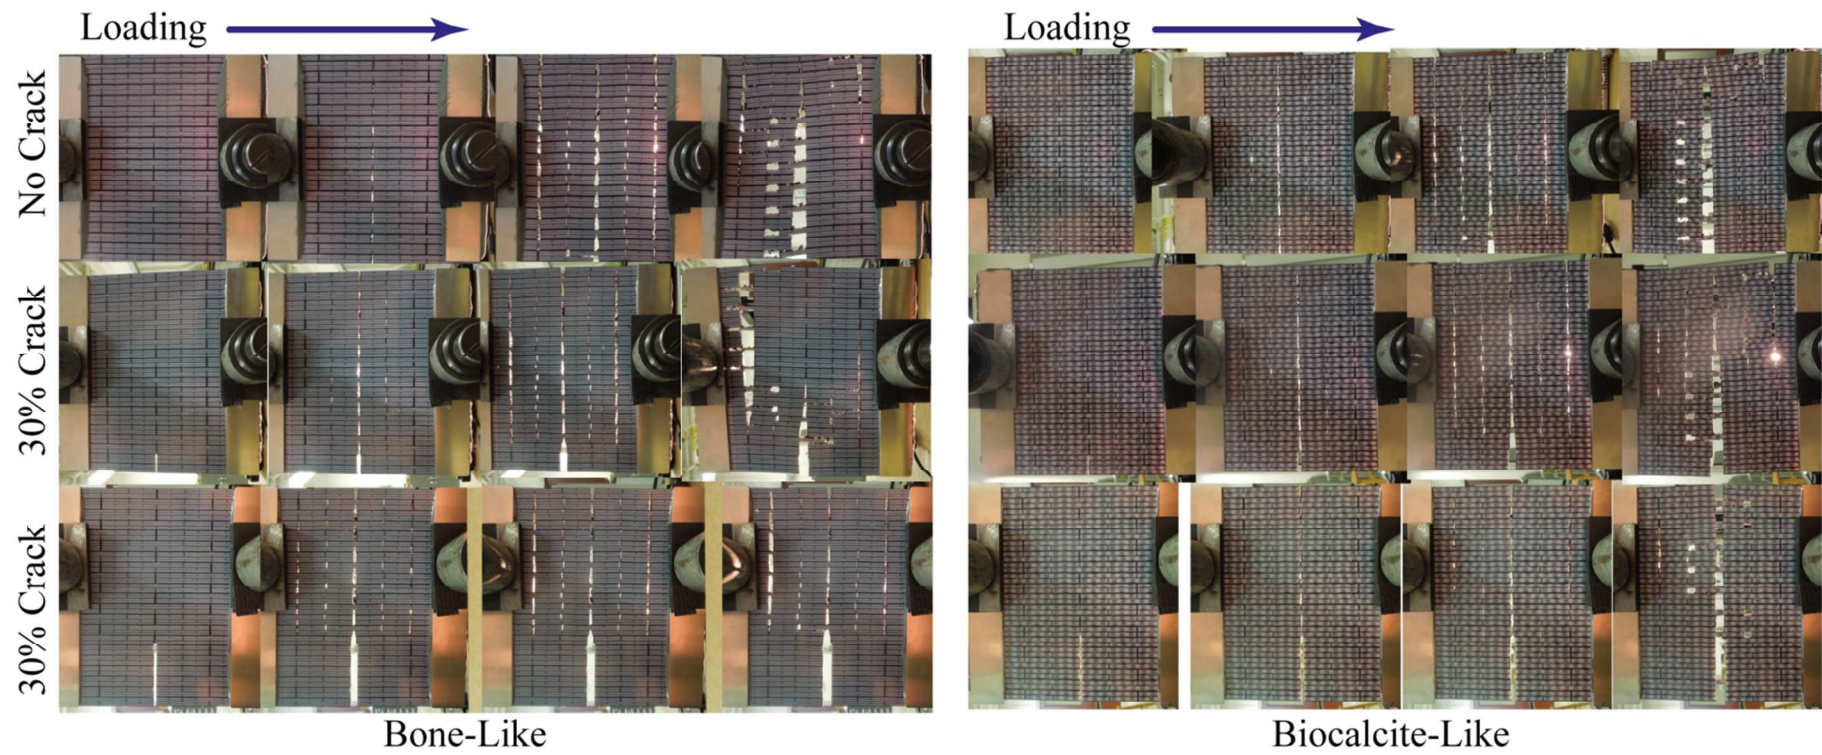

Supplement: Supplementary file 1 [file 3802276]
